# Supplementary material for: Immune-Mediated Competition in Rodent Malaria Is Most Likely Caused by Induced Changes in Innate Immune Clearance of Merozoites
Source: PubMed Central journal article supplement (PMC3900382; doi:10.1371/journal.pcbi.1003416), 2014-01-23
Supplement: pcbi.1003416.s012.pdf [file pcbi.1003416.s012.pdf]

| Variable                            | Description                                              | Units                           |
|-------------------------------------|----------------------------------------------------------|---------------------------------|
| <b>Independent variables</b>        |                                                          |                                 |
| $i$                                 | day post infection                                       |                                 |
| $t \in [0, 1]$                      | time                                                     | day                             |
| $a \in [0, A]$                      | reticulocyte age                                         | day                             |
| <b>Infection phase variables</b>    |                                                          |                                 |
| $M_{AS}$                            | density of free AS merozoites                            | parasites/ $\mu\text{l}$        |
| $M_{AJ}$                            | density of free AJ merozoites                            | parasites/ $\mu\text{l}$        |
| $r(a)$                              | density of unparasitised reticulocytes of age $a$        | cells/ $\mu\text{l}/\text{day}$ |
| $R$                                 | density of unparasitised reticulocytes                   | cells/ $\mu\text{l}$            |
| $N$                                 | density of unparasitised normocytes                      | cells/ $\mu\text{l}$            |
| $I_{m,AS}$                          | adaptive immune clearance of AS merozoites               | $\text{s}^{-1}$                 |
| $I_{m,AJ}$                          | adaptive immune clearance of AJ merozoites               | $\text{s}^{-1}$                 |
| $\hat{I}_{m,AS}$                    | $I_{m,AS}/\beta_{N,AS}$                                  | cells/ $\mu\text{l}$            |
| $\hat{I}_{m,AJ}$                    | $I_{m,AJ}/\beta_{N,AJ}$                                  | cells/ $\mu\text{l}$            |
| $\lambda_{R,AS}$                    | average number of AS parasites per reticulocyte          |                                 |
| $\lambda_{R,AJ}$                    | average number of AJ parasites per reticulocyte          |                                 |
| $\lambda_{N,AS}$                    | average number of AS parasites per normocyte             |                                 |
| $\lambda_{N,AJ}$                    | average number of AJ parasites per normocyte             |                                 |
| $\alpha_R$                          | $\exp(-\lambda_{R,AS} - \lambda_{R,AJ})$                 |                                 |
| $\alpha_N$                          | $\exp(-\lambda_{N,AS} - \lambda_{N,AJ})$                 |                                 |
| <b>RBC turnover phase variables</b> |                                                          |                                 |
| $r_u(a, t)$                         | density of unparasitised reticulocytes of age $a$        | cells/ $\mu\text{l}/\text{day}$ |
| $N_u(t)$                            | density of unparasitised normocytes                      | cells/ $\mu\text{l}$            |
| $R_u(t)$                            | density of unparasitised reticulocytes                   | cells/ $\mu\text{l}$            |
| $U$                                 | uRBC density at start of turnover phase                  | cells/ $\mu\text{l}$            |
| $P_{sAS}(t)$                        | density of singly AS pRBCs                               | cells/ $\mu\text{l}$            |
| $P_{sAJ}(t)$                        | density of singly AJ pRBCs                               | cells/ $\mu\text{l}$            |
| $P_{mAS}(t)$                        | density of multiply AS pRBCs                             | cells/ $\mu\text{l}$            |
| $P_{mAJ}(t)$                        | density of multiply AJ pRBCs                             | cells/ $\mu\text{l}$            |
| $P_{\text{both}}(t)$                | density of multiply AS and AJ pRBCs                      | cells/ $\mu\text{l}$            |
| $p_{sAS}(t)$                        | blood density of AS parasite in singly AS pRBCs          | parasites/ $\mu\text{l}$        |
| $p_{sAJ}(t)$                        | blood density of AJ parasite in singly AJ pRBCs          | parasites/ $\mu\text{l}$        |
| $p_{mAS}(t)$                        | blood density of AS parasite in multiply AS pRBCs        | parasites/ $\mu\text{l}$        |
| $p_{mAJ}(t)$                        | blood density of AJ parasite in multiply AJ pRBCs        | parasites/ $\mu\text{l}$        |
| $p_{\text{both},AS}(t)$             | blood density of AS parasite in multiply AS and AJ pRBCs | parasites/ $\mu\text{l}$        |
| $p_{\text{both},AJ}(t)$             | blood density of AJ parasite in multiply AS and AJ pRBCs | parasites/ $\mu\text{l}$        |
| $I_{p,AS}$                          | adaptive immune clearance of AS pRBCs                    | $\text{day}^{-1}$               |
| $I_{p,AJ}$                          | adaptive immune clearance of AJ pRBCs                    | $\text{day}^{-1}$               |
| $I_{p,\text{both}}$                 | adaptive immune clearance of AS and AJ pRBCs             | $\text{day}^{-1}$               |
| $I_u$                               | bystander clearance rate of uRBCs                        | $\text{day}^{-1}$               |

Table S1: Model variables. Dependence on day  $i$  is dropped for clarity.
