# Supplementary material for: Immune-Mediated Competition in Rodent Malaria Is Most Likely Caused by Induced Changes in Innate Immune Clearance of Merozoites
Source: PubMed Central journal article supplement (PMC3900382; doi:10.1371/journal.pcbi.1003416), 2014-01-23
Supplement: pcbi.1003416.s013.pdf [file pcbi.1003416.s013.pdf]

| Parameter                                        | Description                                                         | Units                                  | Prior                         |
|--------------------------------------------------|---------------------------------------------------------------------|----------------------------------------|-------------------------------|
| <b>Clone-specific parameters<sup>1</sup></b>     |                                                                     |                                        |                               |
| $\omega$                                         | burst size of pRBCs                                                 | parasites                              | $N_T(7, 0.5^2)^2$             |
| $P_0$                                            | initial parasite density                                            | parasites/ $\mu\text{l}$               | $\log P_0 \sim N(1.5, 0.5^2)$ |
| $\beta_R$                                        | infection rate of reticulocytes                                     | $\mu\text{l}/\text{cell}\cdot\text{s}$ |                               |
| $\beta_N$                                        | infection rate of normocytes                                        | $\mu\text{l}/\text{cell}\cdot\text{s}$ |                               |
| $\rho$                                           | $\beta_R/\beta_N$                                                   |                                        | $\log \rho \sim N(0, 1)$      |
| $\kappa$                                         | parasite death rate within multiply parasitised RBCs                | $\text{day}^{-1}$                      | $\text{Exp}(1)$               |
| $\mu$                                            | background loss rate of merozoites                                  | $\text{s}^{-1}$                        |                               |
| $\hat{\mu}$                                      | $\mu/\beta_N$                                                       | cells/ $\mu\text{l}$                   | $\text{Exp}(5 \times 10^6)$   |
| $\nu$                                            | background loss rate of pRBCs                                       | $\text{day}^{-1}$                      | $\text{Exp}(1)$               |
| $c_m$                                            | maximum adaptive immune clearance rate of merozoites                | $\text{s}^{-1}$                        |                               |
| $\hat{c}_m$                                      | $c_m/\beta_N$                                                       | cells/ $\mu\text{l}$                   | $\text{Exp}(10^8)$            |
| $c_p$                                            | maximum adaptive immune clearance rate of pRBCs                     | $\text{day}^{-1}$                      | $\text{Exp}(1)$               |
| $d_m$                                            | duration of adaptive immune clearance of merozoites                 | day                                    | $U(0, 20)$                    |
| $d_p$                                            | duration of adaptive immune clearance of pRBCs                      | day                                    | $U(0, 20)$                    |
| <i>Piecewise linear adaptive immune response</i> |                                                                     |                                        |                               |
| $s_m$                                            | start day of clearance of merozoites                                | day                                    | $U(5, 20)$                    |
| $s_p$                                            | start day of clearance of pRBCs                                     | day                                    | $U(5, 20)$                    |
| $r_m$                                            | rise time of clearance of merozoites                                | day                                    | $U(1, 20)$                    |
| $r_p$                                            | rise time of clearance of pRBCs                                     | day                                    | $U(1, 20)$                    |
| <i>Exponential adaptive immune response</i>      |                                                                     |                                        |                               |
| $s_m$                                            | first day of maximum clearance of merozoites                        | day                                    | $U(5, 20)$                    |
| $s_p$                                            | first day of maximum clearance of pRBCs                             | day                                    | $U(5, 20)$                    |
| <i>Sigmoidal adaptive immune response</i>        |                                                                     |                                        |                               |
| $s_m$                                            | day of half maximum clearance of merozoites                         | day                                    | $U(5, 20)$                    |
| $s_p$                                            | day of half maximum clearance of pRBCs                              | day                                    | $U(5, 20)$                    |
| $r_m$                                            | rate of increase of clearance of merozoites                         | $\text{day}^{-1}$                      | $\text{Exp}(1)$               |
| $r_p$                                            | rate of increase of clearance of pRBCs                              | $\text{day}^{-1}$                      | $\text{Exp}(1)$               |
| <b>Clone-non-specific parameters</b>             |                                                                     |                                        |                               |
| $A$                                              | maturation age of reticulocytes                                     | day                                    | 2                             |
| $\theta$                                         | rate of up-regulation of erythropoiesis                             | $\text{day}^{-1}$                      | $N_T(0.3, 0.1^2)$             |
| $\tau$                                           | time lag in erythropoiesis                                          | day                                    | $U(0, 6)$                     |
| $K$                                              | normal RBC density                                                  | cells/ $\mu\text{l}$                   | $N_T(10^7, 10^{12})$          |
| $d$                                              | natural death rate of RBCs                                          | $\text{day}^{-1}$                      | 0.025                         |
| $\delta_m$                                       | increased death rate of multiply parasitised RBCs                   | $\text{day}^{-1}$                      | $\text{Exp}(1)$               |
| $\nu_{\text{both}}$                              | $\frac{\nu_{\text{AS}} + \nu_{\text{AJ}}}{2}$ , loss of AJ+AS pRBCs | $\text{day}^{-1}$                      |                               |
| $c_u$                                            | maximum bystander clearance rate of uRBCs                           | $\text{day}^{-1}$                      | $\text{Exp}(1)$               |
| $s_u$                                            | start day of bystander clearance of uRBCs                           | day                                    | $U(0, 20)$                    |
| $r_u$                                            | rise time of bystander clearance of uRBCs                           | day                                    | $U(1, 20)$                    |
| $d_u$                                            | duration of bystander clearance of uRBCs                            | day                                    | $U(0, 20)$                    |

Table S2: Model parameters. <sup>1</sup>Dependence on AS and AJ removed for brevity. <sup>2</sup> $N_T$  is a Normal distribution truncated at 0.
