# Supplementary material for: Immune-Mediated Competition in Rodent Malaria Is Most Likely Caused by Induced Changes in Innate Immune Clearance of Merozoites
Source: PubMed Central journal article supplement (PMC3900382; doi:10.1371/journal.pcbi.1003416), 2014-01-23
Supplement: pcbi.1003416.s014.pdf [file pcbi.1003416.s014.pdf]

# 1 Supplementary Material

## 1.1 The mathematical model

In *Plasmodium chabaudi*, parasitised RBCs (pRBCs) rupture synchronously every 24 hours [27], releasing on average 6-8 parasites (merozoites) into the bloodstream [28]. These newly released merozoites infect further RBCs and the cycle repeats. The rupture of pRBCs (schizogony) occurs at approximately midnight [27, 29].

We use a discrete time formulation to model the dynamics, where each time step corresponds to a single day. The start of day  $i$  is defined as the point immediately following rupture of pRBCs, before any infection has occurred (i.e., the point at which merozoites are released into the bloodstream).

We assume that the processes determining RBC density occur on two non-overlapping time-scales. The first corresponds to the short infection phase during which merozoites infect RBCs, which occurs within a few minutes following schizogony. The second and subsequent timescale (the remainder of the day) corresponds to the RBC turnover phase: the parasites replicate within pRBCs and new unparasitised RBCs (uRBCs) are released into the bloodstream from the bone marrow. At the end of the RBC turnover phase, surviving pRBCs rupture and release new merozoites.

The model schematic in Fig. S1 shows the biological processes over a 24 hr period included in our models. Tables S1 and S2 list all the variables and parameters used in the model respectively. The prior distributions were based on a previous study of single-clone infections [25].

### 1.1.1 The infection phase

Some rodent malaria species, such as *P. berghei*, are known to preferentially infect young (1-2 day old), immature RBCs called reticulocytes [47, 48]. By contrast, there is only circumstantial evidence from modelling studies that suggest that *P. chabaudi* prefers reticulocytes [50]. Other models have found no evidence [23]. As discussed in the main text, one possible cause of competition is differential RBC-age preference between the two clones [35, 36]. We therefore want to model RBC age structure. We partition RBCs into reticulocytes and normocytes and allow for different infection rates of each as described in detail below.

The infection dynamics at the start of day  $i$  are modelled in continuous time, using a formulation based on [22]. Just after bursting there are populations of free AS and AJ merozoites in the bloodstream with densities  $M_{AS,i}$  and  $M_{AJ,i}$  respectively. Bursting kills all pRBCs leaving only uRBCs. Let  $r_i(a)$  denote the density of unparasitised reticulocytes of age  $a$ . Let  $R_i = \int_0^A r_i(a) da$  denote the total density of unparasitised reticulocytes where  $A$  is the maturation age of reticulocytes into normocytes (roughly 1-2 days) and let  $N_i$  denote the density of unparasitised normocytes. As infection occurs rapidly over a matter of minutes we can assume that the total reticulocyte and normocyte populations remain constant during infection.

We assume that infection of RBCs by merozoites is density dependent. We also assume that RBCs can be multiply parasitised and that the probability of infection is independent of the number of previous infections. This means we need to keep track of RBCs parasitised by only the AS clone, only the AJ clone and by both clones. We assume AS and AJ merozoites infect reticulocytes at per-capita rates  $\beta_{R,AS}$  and  $\beta_{R,AJ}$  respectively and infect normocytes at rates  $\beta_{N,AS}$  and  $\beta_{N,AJ}$  respectively.

Not all merozoites will invade an RBC, however. Merozoites have been shown to lose infection viability *in vitro* within about 30mins [49]. They are also cleared by the immune response [37, 38]. Following previous models [22, 23], we assume that AS and AJ merozoites are removed from a viable pool at per-capita rates  $\mu_{AS}$  and  $\mu_{AJ}$  respectively. These rates combine physical removal,

45 such as immune-mediated killing, and loss of infection viability.

46 We also explicitly model adaptive immune responses that develop during the course of infection.  
 47 We assume that these responses clear AS and AJ merozoites at time-dependent per-capita rates  
 48  $I_{m,AS,i}$  and  $I_{m,AJ,i}$  respectively (see below for the full definitions). Although these adaptive immune  
 49 responses change over time they will do so on a much longer time scale than the infection phase.  
 50 Thus we can assume that they are constant over the short infection phases.

The functional forms of the adaptive immune clearance rates are unknown. We therefore require forms that are flexible but minimally parameterised. We tried three forms: piecewise linear, exponential and sigmoidal. The piecewise linear form [25] is defined in terms of four parameters: the day of initial activation  $s_m$ , the maximum clearance rate  $\hat{c}_m$ , the time (measured in days) taken to reach maximum clearance rate  $r_m$ , and the duration of the immune response, in days,  $d_m$ . Initially, the clearance rates are set to zero. When an immune response is activated, the clearance rate increases to its maximum level over a number of days. Once the given duration has elapsed, as measured from the start day, the clearance rate returns to zero. The expressions for the adaptive immune responses on day  $i$  are given by

$$\hat{I}_{m,x,i} = \begin{cases} 0 & \text{if } i < s_{m,x} \\ \hat{c}_{m,x}[i - s_{m,x}]/r_{m,x} & \text{if } s_{m,x} \leq i < s_{m,x} + r_{m,x} \\ \hat{c}_{m,x} & \text{if } s_{m,x} + r_{m,x} \leq i < s_{m,x} + d_{m,x} \\ 0 & \text{if } s_{m,x} + d_{m,x} \leq i \end{cases} \quad (1)$$

51 where  $x \in \{AS, AJ\}$ .

The exponential form is defined in terms of three parameters: the day on reaching maximum clearance rate  $s_m$ , the maximum clearance rate  $\hat{c}_m$  and the duration of the response  $d_m$ . The clearance rate is 0 on day 0, it then increases exponentially over  $s_m$  days up to its maximum  $\hat{c}_m$  where it stays until returning to zero after  $d_m$  days. The clearance rates are given by the expressions

$$\hat{I}_{m,x,i} = \begin{cases} \exp(\ln(\hat{c}_{m,x}+1)i/s_{m,x}) - 1 & \text{if } i < s_{m,x} \\ \hat{c}_{m,x} & \text{if } s_{m,x} \leq i < d_{m,x} \\ 0 & \text{if } d_{m,x} \leq i \end{cases} \quad (2)$$

The sigmoidal form is defined in terms of four parameters: the approximate day of half maximum clearance rate  $s_m$ , the maximum clearance rate  $\hat{c}_m$ , the approximate rate of increase on the day of half maximum  $r_m$ , and the duration of the response  $d_m$ . The clearance rate is 0 on day 0, it then increases sigmoidally, asymptotically approaching its maximum  $\hat{c}_m$  until returning to zero after  $d_m$  days. The clearance rates are given by the expressions

$$\hat{I}_{m,x,i} = \begin{cases} \hat{c}_{m,x} \frac{1 - \exp(-r_{m,x}i)}{1 + \exp(-r_{m,x}[i - s_{m,x}])} & \text{if } i < d_{m,x} \\ 0 & \text{if } d_{m,x} \leq i \end{cases} \quad (3)$$

52 Assuming a well-mixed system with mass-action kinetics, infection of RBCs by merozoites  
 53 is a Poisson process. This immediately implies that the probability of an event occurring to a  
 54 merozoite is the rate of that event divided by the sum of the rates of all possible events. For  
 55 example, the probability of an AS merozoite successfully infecting a normocyte (which occurs at  
 56 rate  $\beta_{N,AS}N_i$ ) is  $\beta_{N,AS}N_i/(\beta_{R,AS}R_i + \beta_{N,AS}N_i + \mu_{AS} + I_{m,AS,i})$ , where the denominator is the  
 57 sum of the rates of infecting a reticulocyte, infecting a normocyte, loss of viability and immune  
 58 clearance. Dividing through by  $\beta_{N,AS}$  and letting  $\rho_{AS} = \beta_{R,AS}/\beta_{N,AS}$ ,  $\hat{\mu}_{AS} = \mu_{AS}/\beta_{N,AS}$  and  $\hat{I}_{m,AS,i} =$   
 59  $I_{m,AS,i}/\beta_{N,AS}$  results in the probability  $N_i/(\rho_{AS}R_i + N_i + \hat{\mu}_{AS} + \hat{I}_{m,AS,i})$ . Similar probabilities exist for

60 infection of reticulocytes and for AJ merozoites. This derivation highlights the non-identifiability  
 61 of (i) the reticulocyte and normocyte infection rates, (ii) the background loss rate of merozoites  
 62 and the normocyte infection rate and (iii) the adaptive immune clearance rate of merozoites and  
 63 the normocyte infection rate for each clone. This means we cannot separately estimate these  
 64 parameters; only their ratios are estimatable.

65 The parameter  $\hat{\mu}$  can be interpreted as the reticulocyte density, weighted by  $\rho$  (the ratio of  
 66 reticulocyte invasion rate to normocyte invasion rate), plus the normocyte density at which a single  
 67 merozoite has a 50% chance of infecting a RBC in the absence of an adaptive immune response  
 68 against merozoites.

At the start of the infection phase on day  $i$  there are  $M_{AS,i}$  AS merozoites. Using the above  
 derived probability for an AS merozoite infecting a normocyte, it is simple to show that the average  
 number of surviving AS parasites per normocyte at the end of the infection phase, denoted  $\lambda_{N,AS,i}$ ,  
 is

$$\lambda_{N,AS,i} = \frac{M_{AS,i}}{\rho_{AS}R_i + N_i + \hat{\mu}_{AS} + \hat{I}_{m,AS,i}} \quad (4)$$

Similarly the average number of surviving AJ parasites per normocyte is

$$\lambda_{N,AJ,i} = \frac{M_{AJ,i}}{\rho_{AJ}R_i + N_i + \hat{\mu}_{AJ} + \hat{I}_{m,AJ,i}} \quad (5)$$

the average number of surviving AS parasites per reticulocyte is

$$\lambda_{R,AS,i} = \frac{\rho_{AS}M_{AS,i}}{\rho_{AS}R_i + N_i + \hat{\mu}_{AS} + \hat{I}_{m,AS,i}} \quad (6)$$

and the average number of surviving AJ parasites per reticulocyte is

$$\lambda_{R,AJ,i} = \frac{\rho_{AJ}M_{AJ,i}}{\rho_{AJ}R_i + N_i + \hat{\mu}_{AJ} + \hat{I}_{m,AJ,i}} \quad (7)$$

Since infections occur independently, the number of parasites in a RBC is Poisson distributed.  
 Thus the probability of a reticulocyte being infected with  $n_{AS}$  AS parasites and  $n_{AJ}$  AJ parasites  
 is

$$\Pr(n_{AS}, n_{AJ}) = \frac{\lambda_{R,AS}^{n_{AS}} e^{-\lambda_{R,AS}}}{n_{AS}!} \frac{\lambda_{R,AJ}^{n_{AJ}} e^{-\lambda_{R,AJ}}}{n_{AJ}!} \quad (8)$$

and similarly for a normocyte

$$\Pr(n_{AS}, n_{AJ}) = \frac{\lambda_{N,AS}^{n_{AS}} e^{-\lambda_{N,AS}}}{n_{AS}!} \frac{\lambda_{N,AJ}^{n_{AJ}} e^{-\lambda_{N,AJ}}}{n_{AJ}!} \quad (9)$$

69 From these equations we can derive the density of unparasitised reticulocytes and normocytes by  
 70 setting  $n_{AS} = 0$  and  $n_{AJ} = 0$ , singly parasitised RBCs by setting either  $n_{AS} = 1$  and  $n_{AJ} = 0$  or  
 71  $n_{AS} = 0$  and  $n_{AJ} = 1$ , and multiply parasitised RBCs by setting  $n_{AS} > 1$  and  $n_{AJ} = 0$  or  $n_{AS} = 0$   
 72 and  $n_{AJ} > 1$  or  $n_{AS} > 0$  and  $n_{AJ} > 0$  and summing terms. Note, we do not need to separately  
 73 keep track of parasitised reticulocytes and normocytes as they are not measured and they die after  
 74 24 hours. We can also derive the total blood density of parasites at the end of the infection phase

75 by multiplying the above probabilities by the number of parasites of each strain in a RBC, i.e.,  
 76  $n_{AS}n_{AJ}\Pr(n_{AS}, n_{AJ})$ .

These densities are given as follows. First, let  $\alpha_R = \exp(-\lambda_{R,AS}-\lambda_{R,AJ})$  and  $\alpha_N = \exp(-\lambda_{N,AS}-\lambda_{N,AJ})$ . Then the density of unparasitised reticulocytes of age  $a$  on day  $i$  at the end of the infection phase is (and dropping the dependence on  $i$  for clarity)

$$r_u(a, 0) = \alpha_R r(a) \text{ for all } a \in [0, A] \quad (10)$$

the density of unparasitised normocytes is

$$N_u(0) = \alpha_N N \quad (11)$$

the densities of RBCs (reticulocytes plus normocytes) parasitised by a single AS or AJ parasite are

$$P_{sAS}(0) = \alpha_R \lambda_{R,AS} R + \alpha_N \lambda_{N,AS} N \quad (12)$$

$$P_{sAJ}(0) = \alpha_R \lambda_{R,AJ} R + \alpha_N \lambda_{N,AJ} N \quad (13)$$

the densities of RBCs parasitised by multiple AS or AJ parasites are

$$P_{mAS}(0) = \alpha_R [e^{\lambda_{R,AS}} - 1 - \lambda_{R,AS}] R + \alpha_N [e^{\lambda_{N,AS}} - 1 - \lambda_{N,AS}] N \quad (14)$$

$$P_{mAJ}(0) = \alpha_R [e^{\lambda_{R,AJ}} - 1 - \lambda_{R,AJ}] R + \alpha_N [e^{\lambda_{N,AJ}} - 1 - \lambda_{N,AJ}] N \quad (15)$$

the density of RBCs parasitised by multiple AS and AJ parasites is

$$P_{\text{both}}(0) = \alpha_R [e^{\lambda_{R,AS}} - 1][e^{\lambda_{R,AJ}} - 1] R + \alpha_N [e^{\lambda_{N,AS}} - 1][e^{\lambda_{N,AJ}} - 1] N \quad (16)$$

the blood densities of AS and AJ parasites in single parasitised RBCs are

$$p_{sAS}(0) = P_{sAS}(0) \quad (17)$$

$$p_{sAJ}(0) = P_{sAJ}(0) \quad (18)$$

the blood densities of AS and AJ parasites in RBCs multiply parasitised by AS or AJ parasites are

$$p_{mAS}(0) = \alpha_R \lambda_{R,AS} [e^{\lambda_{R,AS}} - 1] R + \alpha_N \lambda_{N,AS} [e^{\lambda_{N,AS}} - 1] N \quad (19)$$

$$p_{mAJ}(0) = \alpha_R \lambda_{R,AJ} [e^{\lambda_{R,AJ}} - 1] R + \alpha_N \lambda_{N,AJ} [e^{\lambda_{N,AJ}} - 1] N \quad (20)$$

and the blood densities of AS and AJ parasites in RBCs multiply parasitised by AS and AJ parasites are

$$p_{\text{both},AS}(0) = \lambda_{R,AS} [1 - e^{-\lambda_{R,AS}}] R + \lambda_{N,AS} [1 - e^{-\lambda_{N,AS}}] N \quad (21)$$

$$p_{\text{both},AJ}(0) = \lambda_{R,AJ} [1 - e^{-\lambda_{R,AJ}}] R + \lambda_{N,AJ} [1 - e^{-\lambda_{N,AJ}}] N \quad (22)$$

77 We also define the total uRBC density at the end of the infection phase as  $U = N_u + \int_0^A r_u(a, 0) da$ .  
 78 All these densities form the initial conditions of the subsequent RBC turnover phase.

79 **1.1.2 RBC turnover phase**

80 The RBC turnover dynamics occur after the infection dynamics on each day  $i$ . They are modelled  
81 in continuous time  $t \in [0, 1]$ , which has units of days.

82 In the absence of infection, RBCs are lost through natural mortality and gained through the  
83 production of new cells (called erythropoiesis). We take natural RBC decay rate as  $d = 0.025 \text{ day}^{-1}$   
84 [30, 31, 24].

85 Erythropoiesis is up-regulated in response to the anaemia caused by infection and rupture [33,  
86 34, 22, 25]. We assume that the level of up-regulation on day  $i$  is linearly proportional to the  
87 difference between the normal RBC density,  $K$ , and the uRBC density  $\tau$  days earlier,  $U_{i-\tau}$ . The  
88 parameter  $\tau$  measures the feedback lag (in days) between RBC density and the level of erythro-  
89 poiesis. (More complicated functional forms have been used in other modelling studies [36, 40].  
90 However, we have found this simple linear relationship to adequately explain RBC dynamics in  
91 the acute phase.) The up-regulation of erythropoiesis is then given by  $\theta[K - U_{i-\tau}]$ , where  $\theta$  is the  
92 proportion of the RBC deficit that is recovered in a single day.

93 Within-RBC interference competition between parasites is modelled as an additional mortality  
94 of parasites. Let  $\kappa_{AS}$  and  $\kappa_{AJ}$  be the interference-induced mortality rates of AS and AJ parasites,  
95 respectively, in multiply parasitised RBCs.

96 We assume constant background mortality rates  $\nu_{AS}$ ,  $\nu_{AJ}$  and  $\nu_{\text{both}}$  of pRBCs infected with only  
97 the AS clone, only the AJ clone and with both clones respectively. We also assume that multiply-  
98 parasitised RBCs have an additional mortality rate,  $\delta_m$ . This allows for the possibility that these  
99 RBCs may be exploited more rapidly than singly-parasitised cells and die before schizogony.

100 As for merozoites, we explicitly model adaptive immune responses that clear pRBCs. We  
101 assume that these responses clear pRBCs at time-dependent per-capita rates  $I_{p,AS,i}$ ,  $I_{p,AJ,i}$  and  
102  $I_{p,\text{both},i}$  for AS pRBCs, AJ pRBCs and AS plus AJ pRBCs respectively. As for merozoites, we  
103 examined three forms for these clearance rates: piecewise linear, exponential and sigmoidal. The  
104 expressions are similar to those for merozoites above. In addition, we assume that pRBCs infected  
105 by both AS and AJ clones are cleared at the maximum of the rates for single-clone infected RBCs,  
106 i.e.,  $I_{p,\text{both},i} = \max(I_{p,AS,i}, I_{p,AJ,i})$ .

It has been demonstrated that uRBCs can also be removed in a process called bystander killing  
[39]. This is modelled as a time-dependent (piecewise linear) per-capita clearance rate  $I_{u,i}$  of uRBCs  
[25]:

$$I_{u,i} = \begin{cases} 0 & \text{if } i < s_u \\ c_u[i - s_u]/r_u & \text{if } s_u \leq i < s_u + r_u \\ c_u & \text{if } s_u + r_u \leq i < s_u + d_u \\ 0 & \text{if } s_u + d_u \leq i \end{cases} \quad (23)$$

Given the above assumptions, the dynamics of the RBC turnover phase are described by the  
following system of differential equations (dependence on  $i$  is dropped for clarity): for uninfected  
reticulocyte and normocyte densities

$$\frac{\partial r_u(a, t)}{\partial t} + \frac{\partial r_u(a, t)}{\partial a} = -[d + I_u + \delta(a - A)]r_u(a, t) \text{ for all } a \in [0, A] \quad (24)$$

$$\frac{dN_u(t)}{dt} = -[d + I_u]N_u(t) + \delta(a - A)r_u(a, t) \quad (25)$$

where  $\delta(\cdot)$  is the Dirac-delta function. For pRBC densities

$$\frac{dP_{sAS}(t)}{dt} = -[d + \nu_{AS} + I_{p,AS}]P_{sAS}(t) \quad (26)$$

$$\frac{dP_{sAJ}(t)}{dt} = -[d + \nu_{AJ} + I_{p,AJ}]P_{sAJ}(t) \quad (27)$$

$$\frac{dP_{mAS}(t)}{dt} = -[d + \nu_{AS} + I_{p,AS} + \delta_m]P_{mAS}(t) \quad (28)$$

$$\frac{dP_{mAJ}(t)}{dt} = -[d + \nu_{AJ} + I_{p,AJ} + \delta_m]P_{mAJ}(t) \quad (29)$$

$$\frac{dP_{\text{both}}(t)}{dt} = -[d + \nu_{\text{both}} + I_{p,\text{both}} + \delta_m]P_{\text{both}}(t) \quad (30)$$

and for parasite blood densities

$$\frac{dp_{sAS}(t)}{dt} = -[d + \nu_{AS} + I_{p,AS}]p_{sAS}(t) \quad (31)$$

$$\frac{dp_{sAJ}(t)}{dt} = -[d + \nu_{AJ} + I_{p,AJ}]p_{sAJ}(t) \quad (32)$$

$$\frac{dp_{mAS}(t)}{dt} = -[d + \nu_{AS} + I_{p,AS} + \delta_m + \kappa_{AS}]p_{mAS}(t) \quad (33)$$

$$\frac{dp_{mAJ}(t)}{dt} = -[d + \nu_{AJ} + I_{p,AJ} + \delta_m + \kappa_{AJ}]p_{mAJ}(t) \quad (34)$$

$$\frac{dp_{\text{both,AS}}(t)}{dt} = -[d + \nu_{\text{both}} + I_{p,\text{both}} + \delta_m + \kappa_{AS}]p_{\text{both,AS}}(t) \quad (35)$$

$$\frac{dp_{\text{both,AJ}}(t)}{dt} = -[d + \nu_{\text{both}} + I_{p,\text{both}} + \delta_m + \kappa_{AJ}]p_{\text{both,AJ}}(t) \quad (36)$$

107 The boundary condition,  $r_{u,i}(0, t) = dK + \theta[K - U_{i-\tau}]$ , for Equation 24 represents migration of  
 108 new reticulocytes from bone marrow and spleen into the circulation. We assume it is constant  
 109 throughout the day. This assumption is for computational convenience, otherwise we would have  
 110 to solve delay differential equations which would become computational prohibitive. Given that  
 111 upregulation is only important for the RBC dynamics after peak anaemia, this assumption has  
 112 little consequence for our conclusions about immune-mediated competition.

The initial conditions for Equations 24-36 are obtained from Equations 10-22. The solutions of Equations 24 and 25 are

$$r_{u,i}(a, t) = \begin{cases} [dK + \theta[K - U_{i-\tau}]] e^{-[d+I_{u,i}]a} & \text{if } 0 \leq a < t \\ r_{u,i}(a-t, 0) e^{-[d+I_{u,i}]t} & \text{if } t \leq a < A \end{cases} \quad (37)$$

$$N_{u,i}(t) = \left[ N_{u,i}(0) + \int_{A-t}^A r_{u,i}(a, 0) da \right] e^{-[d+I_{u,i}]t} \quad (38)$$

113 where  $r_{u,i}(a, 0)$  is the initial age distribution of unparasitised reticulocyte density on day  $i$  and  
 114  $N_{u,i}(0)$  the initial density of unparasitised normocytes on day  $i$ . The solutions of Equations 26-  
 115 36 are simply decaying exponentials. For example, the solution of Equation 26 is  $P_{sAS,i}(t) =$   
 116  $P_{sAS,i}(0) \exp(-[d + \nu_{AS} + I_{p,AS}]t)$ . In order to compute  $r_{u,i}(a, t)$  we discretise reticulocyte age  $a$ .  
 117 The maximum discretisation possible is  $\Delta a = 8$  hrs as this is the time between bursting at midnight  
 118 and observation at 8am. We have found that smaller discretisations do not affect model fits or the  
 119 inferences drawn from them. We therefore choose this discretisation for computational speed.

### 120 1.1.3 Rupture of parasitised RBCs

The final event on day  $i$  is the rupture of pRBCs and release of free merozoites at midnight. At this point each surviving AS and AJ parasite produces  $\omega_{AS}$  and  $\omega_{AJ}$  merozoites, respectively, and all pRBC densities return to zero. We assume the burst sizes are independent of the age of the pRBC. The AS and AJ merozoite densities after rupture on the  $(i + 1)^{th}$  day are then given by

$$M_{AS,i+1} = \omega_{AS}[p_{sAS,i}(1) + p_{mAS,i}(1) + p_{both,AS,i}(1)] \quad (39)$$

$$M_{AJ,i+1} = \omega_{AJ}[p_{sAJ,i}(1) + p_{mAJ,i}(1) + p_{both,AJ,i}(1)] \quad (40)$$

121 The unparasitised reticulocyte density is  $R_{i+1} = R_{u,i}(1)$ , and the unparasitised normocyte density  
 122 is  $N_{i+1} = N_{u,i}(1)$ , which are needed for Equations 4-7. Also needed is the density of unparasitised  
 123 reticulocytes of age  $a$  for Equation 10,  $r_{i+1}(a) = r_{u,i}(a, 1)$ .

### 124 1.1.4 Initial conditions

125 During the experiments the mice were inoculated intraperitoneally with  $10^5$  AS pRBCs,  $10^5$  AJ  
 126 pRBCs or both at 08:00 hrs on day 0. However, it might be the case that not all parasites enter  
 127 the bloodstream. We therefore estimate the initial circulating AS and AJ parasite densities,  $P_{0,AS}$   
 128 and  $P_{0,AJ}$  from the data. The initial conditions on day 0 are, therefore,  $P_{sAS,0}(1/3) = P_{0,AS}$  or 0,  
 129  $P_{sAJ,0}(1/3) = P_{0,AJ}$  or 0,  $P_{mAS,0}(1/3) = P_{mAJ,0}(1/3) = P_{both,0}(1/3) = 0$ ,  $p_{sAS,0}(1/3) = P_{0,AS}$  or 0,  
 130  $p_{sAJ,0}(1/3) = P_{0,AJ}$  or 0,  $p_{mAS,0}(1/3) = P_{mAJ,0}(1/3) = P_{both,AS,0}(1/3) = P_{both,AJ,0}(1/3) = 0$ .

The initial total RBC density in the mice was assumed to be the normal RBC density in the absence of an infection. RBCs die naturally at rate  $d = 0.025\text{day}^{-1}$  [32]. The initial total density of RBCs  $K$ , is partitioned between the reticulocytes and normocytes as follows

$$r_{u,0}(a, 1/3) = dK e^{-da} \text{ for all } a \in [0, A] \quad (41)$$

$$N_{u,0}(1/3) = K e^{-dA} \quad (42)$$

131  $K$  is estimated from the data.

## 132 1.2 McMC diagnostics and model adequacy

133 The convergences of the Markov chains to the posteriors of each mouse are assessed using the  
 134 Gelman-Rubin statistic [52]. Figure S2 shows the Gelman-Rubin statistics of each parameter of  
 135 the all-cause model for all mice. A statistic below 1.1 suggests excellent convergence of the Markov  
 136 chains [51].

137 The standardised residuals for the all-cause model for the three mice phenotypes are given in  
 138 (Figs. S3, S4 and S5). The standardised residuals of an adequate model should be approximately  
 139 normally distributed with mean 0 and standard deviation 1.

140 The Q-Q plot for the all-cause model for the three mouse phenotypes are given in (Figs. S6, S7  
 141 and S8). The overlaid residuals and the Normal Q-Q plot in all three suggest adequate fits with  
 142 some minor over and under estimation of the dynamics.

## 143 1.3 Likelihood plots by mouse phenotypes

144 Figures S9-S11 show the plots of  $\log_{10}$ -marginal likelihood against  $\log_{10}$ -maximum likelihood of the  
 145 models tested in Table 2 for each mouse phenotype. The ability of nude mice to discriminate be-  
 146 tween hypotheses is weak. However, regardless of phenotype, hypothesis  $H_5$  is always the minimally  
 147 adequate model.
